# Supplementary material for: Investigating the Effect of Research and Development Intensity on Firm Profitability with Panel Data Analysis
Source: Research Square preprint supplement (doi:10.21203/rs.3.rs-6725041/v1), 2025-07-10
Supplement: Supplementary file 1 [file de776699347b7b8af52ade06.xlsx]

## Sheet: Panel_Data_Set
CODE	NO	PERIOD	R&D_IN	VA_KA	VA_BU	ES_KA	FI_SI
ALCTL	1	2010/12	0.171229	0.220284	3.29088	0.00323238	19.1567																					AKTİF KARLILIĞI
ALCTL	1	2011/12	0.233906	-5.5225	15.1402	-2.78126	19.2977																						hasılattaki büyüme
ALCTL	1	2012/12	0.168062	7.59804	-3.70465	4.94589	19.2599
ALCTL	1	2013/12	1.80635	-7.73443	9.91697	-1.18347	19.3545
ALCTL	1	2014/12	2.09031	-0.203649	26.7664	1.0374	19.5916
ALCTL	1	2015/12	3.37422	7.74465	2.09409	0.763312	19.6124
ALCTL	1	2016/12	2.48697	9.96396	15.2822	11.4065	19.7546
ALCTL	1	2017/12	2.86385	5.42902	25.25	5.86383	19.9797
ALCTL	1	2018/12	2.35292	6.65586	37.0657	18.0801	20.295
ALCTL	1	2019/12	2.37859	-3.95654	24.6238	3.87818	20.5151
ALCTL	1	2020/12	1.61327	2.02177	49.3215	8.76436	20.9161
ALCTL	1	2021/12	2.07266	3.95557	15.8949	-1.80161	21.0636
ALCTL	1	2022/12	0.659247	12.7384	63.5906	20.2091	21.5558
ALCTL	1	2023/12	0.922034	-5.36	32.95	2.76	21.8406
ASELS	2	2010/12	2.73278	9.53831	-8.51854	14.7431	21.5443
ASELS	2	2011/12	3.25759	6.89219	5.24636	15.4312	21.5954
ASELS	2	2012/12	3.91293	10.7195	38.9696	12.2667	21.9245
ASELS	2	2013/12	2.94058	6.49414	20.5691	16.268	22.1116
ASELS	2	2014/12	2.84227	8.6318	26.6458	14.8274	22.3478
ASELS	2	2015/12	3.16426	3.76167	23.0336	11.6903	22.5551
ASELS	2	2016/12	2.19216	10.7147	37.6737	16.0803	22.8748
ASELS	2	2017/12	1.79777	13.5982	35.3662	18.9685	23.1776
ASELS	2	2018/12	1.27	14.9022	67.3194	19.1397	23.6923
ASELS	2	2019/12	1.62585	14.8113	31.6295	20.0775	23.9671
ASELS	2	2020/12	1.75467	14.8981	33.0089	22.6147	24.2524
ASELS	2	2021/12	1.65226	17.714	36.1324	25.1749	24.5609
ASELS	2	2022/12	3.01861	19.4609	211.99	25.1783	25.6986
ASELS	2	2023/12	3.59513	4.58	19.65	17.16	25.8781
KAREL	3	2010/12	4.51184	9.62259	79.3599	12.1605	19.3776
KAREL	3	2011/12	5.8034	4.92796	-20.2687	5.32656	19.1511
KAREL	3	2012/12	5.36343	5.68496	18.2699	4.73991	19.3189
KAREL	3	2013/12	5.70263	5.3225	15.7048	9.04342	19.4648
KAREL	3	2014/12	7.7083	3.50685	13.508	7.12435	19.5915
KAREL	3	2015/12	7.01366	2.08554	20.1169	8.92249	19.7748
KAREL	3	2016/12	5.92998	2.45354	15.4208	6.88964	19.9182
KAREL	3	2017/12	5.89434	6.35541	21.0338	11.1475	20.1091
KAREL	3	2018/12	4.14141	10.3673	43.302	22.6339	20.4689
KAREL	3	2019/12	2.87121	12.0293	43.6628	19.5459	20.8312
KAREL	3	2020/12	2.29836	9.25285	36.023	17.0108	21.1388
KAREL	3	2021/12	1.65538	3.83845	28.4561	17.5633	21.3892
KAREL	3	2022/12	2.49	1.42426	332.29	14.3344	22.8532
KAREL	3	2023/12	1.63	2.62	13.08	6.32	22.9761
KRONT	4	2010/12	15.0415	26.6754	8.63489	22.5861	16.2852
KRONT	4	2011/12	24.8157	16.4482	60.2145	11.0291	16.7566
KRONT	4	2012/12	49.6752	-32.7001	-26.6742	-67.6661	16.4463
KRONT	4	2013/12	12.6152	8.65527	24.0422	6.88603	16.6618
KRONT	4	2014/12	17.7068	13.5283	38.9765	21.437	16.9909
KRONT	4	2015/12	23.1641	24.3163	13.5996	35.9394	17.1184
KRONT	4	2016/12	17.119	35.9017	57.039	46.0945	17.5698
KRONT	4	2017/12	24.68	18.0703	13.3248	25.9775	17.6948
KRONT	4	2018/12	20.8365	8.73432	14.3429	-3.39607	17.8289
KRONT	4	2019/12	21.8653	16.8034	39.1366	12.0409	18.1592
KRONT	4	2020/12	31.1052	11.8504	32.1571	-0.740315	18.438
KRONT	4	2021/12	25.8158	26.9922	55.4698	15.3056	18.8793
KRONT	4	2022/12	26.95	26.125	159.68	21.8127	19.8335
KRONT	4	2023/12	23.51	9.44	39.11	23.48	20.1636
LINK	5	2010/12	22.4286	-6.36763	-5.85749	-17.6236	15.6317
LINK	5	2011/12	25.703	72.2677	110.752	-69.1615	16.3772
LINK	5	2012/12	19.9568	-8.44097	-8.05083	-52.4083	16.2933
LINK	5	2013/12	14.6576	7.62278	12.0358	-2.03018	16.407
LINK	5	2014/12	13.6352	4.00487	4.96952	-5.26033	16.4555
LINK	5	2015/12	11.7418	12.3082	19.8653	3.1217	16.6367
LINK	5	2016/12	13.8879	7.96096	17.7212	-10.5364	16.7998
LINK	5	2017/12	12.8432	17.1518	17.5207	26.6301	16.9613
LINK	5	2018/12	13.4599	26.6034	36.8745	28.226	17.2751
LINK	5	2019/12	12.3815	20.6192	27.0915	32.0992	17.5149
LINK	5	2020/12	12.1364	26.3609	27.1409	38.904	17.755
LINK	5	2021/12	12.1354	39.8359	57.8372	39.3664	18.2114
LINK	5	2022/12	19.43	44.7836	141.48	45.4643	19.093
LINK	5	2023/12	17.98	1.42	0.96	36.29	19.1026
LOGO	6	2010/12	45.0812	-1.09676	-5.63657	-1.42206	17.4342
LOGO	6	2011/12	32.3347	7.18163	33.384	21.3844	17.7223
LOGO	6	2012/12	30.3249	19.0934	26.4745	25.8861	17.9572
LOGO	6	2013/12	24.1808	20.5493	98.2994	29.5155	18.6418
LOGO	6	2014/12	28.1367	18.9439	33.1887	28.4183	18.9284
LOGO	6	2015/12	28.6132	21.6532	21.7904	31.4183	19.1255
LOGO	6	2016/12	31.185	17.113	61.8699	36.2521	19.6071
LOGO	6	2017/12	24.1625	14.3038	16.9839	22.9074	19.764
LOGO	6	2018/12	25.9448	14.3087	46.9752	21.246	20.1491
LOGO	6	2019/12	24.0494	12.8929	37.7468	21.8561	20.4693
LOGO	6	2020/12	21.7518	12.2277	41.4818	20.8876	20.8163
LOGO	6	2021/12	22.8806	18.2204	64.6868	27.0463	21.3152
LOGO	6	2022/12	24.5767	18.5803	171.14	24.3522	22.3127
LOGO	6	2023/12	31.3895	2.54	25.44	11.5	22.5394
NETAS	7	2010/12	0.450047	5.95875	-3.98383	7.71622	19.8202
NETAS	7	2011/12	0.208029	3.77415	35.0244	6.13326	20.1205
NETAS	7	2012/12	0.105884	4.2424	9.76447	3.36608	20.2137
NETAS	7	2013/12	0.114085	0.318838	29.3942	1.81577	20.4714
NETAS	7	2014/12	0.167689	1.41146	15.9258	2.75841	20.6191
NETAS	7	2015/12	0.39329	3.04431	50.1061	4.3114	21.0253
NETAS	7	2016/12	0	1.36872	1.69093	6.76546	21.0421
NETAS	7	2017/12	0.378919	3.73248	8.48649	7.10392	21.1235
NETAS	7	2018/12	1.30873	-5.28266	13.6503	-3.01056	21.2515
NETAS	7	2019/12	0.557764	-8.02789	18.2958	-2.42619	21.4195
NETAS	7	2020/12	0.326442	-3.22054	20.1827	-0.0365017	21.6033
NETAS	7	2021/12	0.640485	-21.9878	52.0856	-21.5303	22.0226
NETAS	7	2022/12	0.163477	-0.779115	13.987	1.70047	22.1535
NETAS	7	2023/12	0.0342923	2.01	37.13	2.21	22.4693
